# Supplementary material for: Locked Nucleic Acid Gapmers and Conjugates Potently Silence ADAM33, an Asthma-Associated Metalloprotease with Nuclear-Localized mRNA
Source: PubMed Central journal article supplement (PMC5498289; doi:10.1016/j.omtn.2017.06.012), 2017-06-21
Supplement: mmc1.pdf [file mmc1.pdf]

OMTN, Volume 8

## Supplemental Information

**Locked Nucleic Acid Gappers and Conjugates**

**Potently Silence *ADAM33*, an Asthma-Associated**

**Metalloprotease with Nuclear-Localized mRNA**

**Hannah M. Pendergraff, Pranathi Meda Krishnamurthy, Alexandre J. Debacker, Michael P. Moazami, Vivek K. Sharma, Liisa Niitsoo, Yong Yu, Yen Nee Tan, Hans Michael Haitchi, and Jonathan K. Watts**

# Locked Nucleic Acid gapmers and conjugates induce potent silencing of *ADAM33*, an asthma-associated metalloprotease with nuclear-localized mRNA

Hannah M. Pendergraff, Pranathi Meda Krishnamurthy, Alexandre J. Debacker, Michael P. Moazami, Vivek K. Sharma, Liisa Niitsoo, Yong Yu, Yen Nee Tan, Hans Michael Haitchi, Jonathan K. Watts

---

## Supporting Information:

Supporting Figure S1: Comparison of unmodified and fully modified duplex siRNA

Supporting Figure S2: qRT-PCR time course results, gymnotic delivery

Supporting Tables S1–S5: Sequences and mass spectrometry data

---

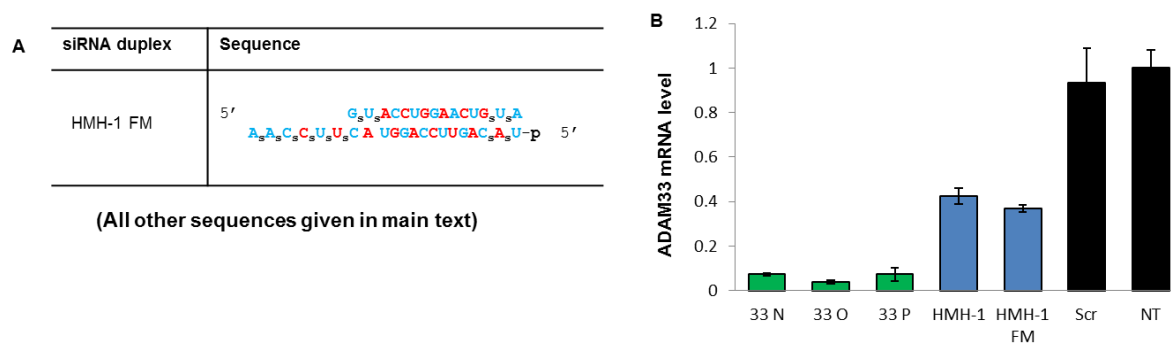

**Figure S1.** Silencing by a fully chemically modified duplex siRNA. **(A)** Sequence and modification pattern for the fully modified siRNA. Sequence modification codes are 's' (phosphorothioate linkage); red: 2'F-RNA; blue: 2'OMe-RNA; p (5'-phosphate). Passenger strand is listed on top and guide strand underneath. **(B)** qPCR results showing ADAM33 level 3 days after transfection. Oligonucleotides were delivered with Lipofectamine RNAiMAX at 50 nM and normalized to a non-treated control. Error bars represent standard deviation of independent biological duplicates. Green bars are LNA gapmers, Blue bars are native or modified duplex siRNAs, Black bars are negative controls.

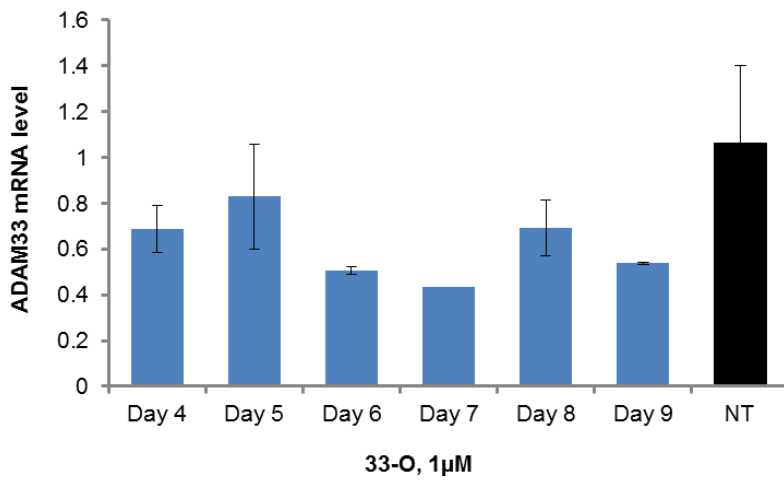

**Figure S2.** qRT-PCR time course results of gymnotic delivery at 1  $\mu\text{M}$  concentration of ASO **33-O**. Oligonucleotides are delivered at 1  $\mu\text{M}$  dose and normalized to a non-treated control. Error bars are standard deviation of technical replicates. The degree of knockdown is intentionally chosen to be suboptimal (by using 1  $\mu\text{M}$  rather than 3  $\mu\text{M}$  ASO) to allow better discrimination of any differences in efficacy.

**Table S1.** siRNA sequences designed to target *ADAM33* mRNA, with mass spectrometry data. S represents sense strand, AS represents anti-sense strand.

| siRNA           | Sequence<br>Uppercase: RNA; Lowercase: DNA<br>For the bottom row only: <b>2'-F-RNA</b> ; <b>2'-O-methyl-RNA</b> ;<br>p: 5' phosphate; 's': phosphorothioate                                                                                                                  | Calculated mass (g/mol) | Found mass (g/mol)        |
|-----------------|------------------------------------------------------------------------------------------------------------------------------------------------------------------------------------------------------------------------------------------------------------------------------|-------------------------|---------------------------|
| <b>HMH-1</b>    | 5' GGAAGUACCUGGAACUGUA<br>tt CCUUCAUGGACCUUGACAU 5'                                                                                                                                                                                                                          | S: 6124.7<br>AS: 6567.0 | S: 6123.8<br>AS: 6565.8   |
| <b>HMH-2</b>    | 5' GGUGAGAGGUAGCUCCUAA<br>tt CCACUCUCCAUCGAGGAUU 5'                                                                                                                                                                                                                          | S: 6140.7<br>AS: 6566.0 | S: 6139.8<br>AS: 6564.9   |
| <b>HP--1</b>    | 5' AGAAAGACAUGUUGGCUAU<br>tt UCUUUCUGUACAACCGAUA 5'                                                                                                                                                                                                                          | S: 6109.7<br>AS: 6552.0 | S: 6108.7<br>AS: 6550.8   |
| <b>HP- 2</b>    | 5' GGGAGAUGCUCUUGGAAAC<br>tt CCCUCUACGAGUACCUUUG 5'                                                                                                                                                                                                                          | S: 6163.8<br>AS: 6543.0 | S: 6162.7<br>AS: 6542.7   |
| <b>HP-3</b>     | 5' UGCUUGAGCUGGAGAAGAA<br>tt ACGAACUCGACCUCUUCUU 5'                                                                                                                                                                                                                          | S: 6164.8<br>AS: 6527.0 | S: 6163.7<br>AS: 6525.7   |
| <b>HP-4</b>     | 5' UGGUGAACUCUGCGGGAGA<br>tt ACCACUUGAGACGCCUCU 5'                                                                                                                                                                                                                           | S: 6156.7<br>AS: 6565.0 | S: 6155.7<br>AS: 6564.8   |
| <b>HP-5</b>     | 5' CCCAACACACGGAUCAUU tt<br>tt GGGUUGGUGUGCCUAGUAA 5'                                                                                                                                                                                                                        | S: 6572.1<br>AS: 6743.1 | S: 6570.9<br>AS: 6742.9   |
| <b>HP- 6</b>    | 5' UGGCCCUGUGCAGGCUGAA tt<br>tt ACCGGGACACGUCCGACUU 5'                                                                                                                                                                                                                       | S: 6701.1<br>AS: 6644.1 | S: 6701.0<br>AS: 6643.0   |
| <b>HP- 7</b>    | 5' AGUCCAGAUGCCAAGAUGC tt<br>tt UCAGGUCUACGGUUCUAGG 5'                                                                                                                                                                                                                       | S: 6652.1<br>AS: 6663.0 | S: 6652.0<br>AS: 6662.9   |
| <b>HP- 8</b>    | 5' CCAGACGUUUACCUACUGG tt<br>tt GGUCUGCAAUUGGAUGACC 5'                                                                                                                                                                                                                       | S: 6606.0<br>AS: 6709.1 | S: 6605.9<br>AS: 6708.0   |
| <b>HP- 9</b>    | 5' AGGGCGCCACAGUGGGCCU tt<br>tt UCCCGCGGUGUCACCCGGA 5'                                                                                                                                                                                                                       | S: 6739.1<br>AS: 6636.1 | S: 6739.0<br>AS: 6636.0   |
| <b>HP-10</b>    | 5' GAUCAAGUCCAGAUGCCAA tt<br>tt CUAGUUCAGGUCUACGGUU 5'                                                                                                                                                                                                                       | S: 6676.1<br>AS: 6624.0 | S: 6675.0<br>AS: 6623.8   |
| <b>HP- 11</b>   | 5' UAGCAACCAUAACUGCCAC tt<br>tt AUCGUUGGUAUUGACGGUG 5'                                                                                                                                                                                                                       | S: 6596.1<br>AS: 6704.0 | S: 6594.9<br>AS: 6703.9   |
| <b>Scr</b>      | 5' AGUGGAGGGCGCCUGCCAC tt<br>tt UCACCUCCCGCGGACGGUG 5'                                                                                                                                                                                                                       | S: 6739.1<br>AS: 6636.1 | S: 6739.05<br>AS: 6634.99 |
| <b>HMH-1 FM</b> | 5' <b>G<sub>s</sub> U<sub>s</sub> ACCUGGAACUG<sub>s</sub> U<sub>s</sub> A<sub>s</sub></b><br><b>A<sub>s</sub> A<sub>s</sub> C<sub>s</sub> C<sub>s</sub> U<sub>s</sub> U<sub>s</sub> C<sub>s</sub> A<sub>s</sub> UGGACCUUGAC<sub>s</sub> A<sub>s</sub> U<sub>s</sub>-p</b> 5' | S: 4977.3<br>AS: 7010.7 | S: 4977.7<br>AS: 7009.8   |

**Table S2.** ss-siRNA sequences designed to target *ADAM33* mRNA, with mass spectrometry data.

| ss-siRNA   | Sequence (5'-3')<br>' <sub>s</sub> ': phosphorothioate; LNA; 2'-F-RNA; 2'-O-methyl-RNA; MOE;<br>P: 5' phosphate                                                                                                             | Calculated mass (g/mol) | Found mass (g/mol) |
|------------|-----------------------------------------------------------------------------------------------------------------------------------------------------------------------------------------------------------------------------|-------------------------|--------------------|
| ssi-HMH-1a | P-U <sub>s</sub> ACAGUCCAGG <sub>s</sub> U <sub>s</sub> A <sub>s</sub> C <sub>s</sub> U <sub>s</sub> U <sub>s</sub> C <sub>s</sub> C <sub>s</sub> A <sub>s</sub> A                                                          | 7131.0                  | 7131.6             |
| ssi-HP-2   | P-G <sub>s</sub> UUUCCAUGAGC <sub>s</sub> A <sub>s</sub> U <sub>s</sub> C <sub>s</sub> U <sub>s</sub> C <sub>s</sub> C <sub>s</sub> C <sub>s</sub> A <sub>s</sub> A                                                         | 7107.0                  | 7106.6             |
| ssi-HP-3   | P-U <sub>s</sub> UCUUCUCCAGC <sub>s</sub> U <sub>s</sub> C <sub>s</sub> A <sub>s</sub> A <sub>s</sub> G <sub>s</sub> C <sub>s</sub> A <sub>s</sub> A <sub>s</sub> A                                                         | 7091.0                  | 7090.6             |
| ssi-HMH-1b | P-U <sub>s</sub> A <sub>s</sub> CA <sub>s</sub> GU <sub>s</sub> UC <sub>s</sub> CA <sub>s</sub> GG <sub>s</sub> UA <sub>s</sub> C <sub>s</sub> U <sub>s</sub> U <sub>s</sub> C <sub>s</sub> C <sub>s</sub> A <sub>s</sub> A | 7196.0                  | 7195.7             |
| ssi-HMH-1c | P-U <sub>s</sub> A <sub>s</sub> CA <sub>s</sub> GU <sub>s</sub> UC <sub>s</sub> CA <sub>s</sub> GG <sub>s</sub> UA <sub>s</sub> C <sub>s</sub> U <sub>s</sub> U <sub>s</sub> C <sub>s</sub> C <sub>s</sub> A <sub>s</sub> A | 7108.1                  | 7107.7             |
| ssi-HMH-1d | P-U <sub>s</sub> A <sub>s</sub> CA <sub>s</sub> GU <sub>s</sub> UC <sub>s</sub> CA <sub>s</sub> GG <sub>s</sub> UA <sub>s</sub> C <sub>s</sub> U <sub>s</sub> U <sub>s</sub> C <sub>s</sub> C <sub>s</sub> A <sub>s</sub> A | 7104.1                  | 7103.6             |

**Table S3.** LNA gapmer ASOs designed to target h*ADAM33* mRNA, and LNA controls, with mass spectrometry data.

| LNA gapmer | Sequence (5'-3')<br>-' <sub>s</sub> ': phosphorothioate; LNA; Lowercase: DNA;<br>HOP: Hexadecyloxypropyl                                                                                                                                                                                            | Calculated mass (g/mol) | Found mass (g/mol) |
|------------|-----------------------------------------------------------------------------------------------------------------------------------------------------------------------------------------------------------------------------------------------------------------------------------------------------|-------------------------|--------------------|
| 33-G       | T <sub>s</sub> G <sub>s</sub> A <sub>s</sub> t <sub>s</sub> C <sub>s</sub> C <sub>s</sub> g <sub>s</sub> t <sub>s</sub> g <sub>s</sub> t <sub>s</sub> g <sub>s</sub> g <sub>s</sub> T <sub>s</sub> T <sub>s</sub> G                                                                                 | 5023.0                  | 5023.1             |
| 33-H       | A <sub>s</sub> T <sub>s</sub> G <sub>s</sub> a <sub>s</sub> t <sub>s</sub> C <sub>s</sub> C <sub>s</sub> g <sub>s</sub> t <sub>s</sub> g <sub>s</sub> t <sub>s</sub> g <sub>s</sub> G <sub>s</sub> T <sub>s</sub> T                                                                                 | 5007.0                  | 5007.1             |
| 33-I       | A <sub>s</sub> A <sub>s</sub> T <sub>s</sub> g <sub>s</sub> a <sub>s</sub> t <sub>s</sub> C <sub>s</sub> C <sub>s</sub> g <sub>s</sub> t <sub>s</sub> g <sub>s</sub> t <sub>s</sub> G <sub>s</sub> GG <sub>s</sub> T                                                                                | 5016.0                  | 5016.1             |
| 33-J       | C <sub>s</sub> A <sub>s</sub> A <sub>s</sub> t <sub>s</sub> g <sub>s</sub> a <sub>s</sub> t <sub>s</sub> C <sub>s</sub> C <sub>s</sub> g <sub>s</sub> t <sub>s</sub> g <sub>s</sub> T <sub>s</sub> GG <sub>s</sub> G                                                                                | 5015.0                  | 5015.0             |
| 33-L       | T <sub>s</sub> G <sub>s</sub> T <sub>s</sub> C <sub>s</sub> a <sub>s</sub> t <sub>s</sub> g <sub>s</sub> g <sub>s</sub> t <sub>s</sub> t <sub>s</sub> t <sub>s</sub> t <sub>s</sub> C <sub>s</sub> A <sub>s</sub> G                                                                                 | 4996.0                  | 4996.0             |
| 33-M       | G <sub>s</sub> G <sub>s</sub> T <sub>s</sub> g <sub>s</sub> t <sub>s</sub> C <sub>s</sub> a <sub>s</sub> t <sub>s</sub> g <sub>s</sub> g <sub>s</sub> t <sub>s</sub> T <sub>s</sub> T <sub>s</sub> C                                                                                                | 5012.0                  | 5012.1             |
| 33-N       | A <sub>s</sub> G <sub>s</sub> G <sub>s</sub> t <sub>s</sub> g <sub>s</sub> t <sub>s</sub> C <sub>s</sub> a <sub>s</sub> t <sub>s</sub> g <sub>s</sub> g <sub>s</sub> t <sub>s</sub> T <sub>s</sub> T <sub>s</sub> T                                                                                 | 5022.0                  | 5022.0             |
| 33-O       | T <sub>s</sub> C <sub>s</sub> A <sub>s</sub> t <sub>s</sub> t <sub>s</sub> t <sub>s</sub> t <sub>s</sub> a <sub>s</sub> g <sub>s</sub> g <sub>s</sub> a <sub>s</sub> g <sub>s</sub> C <sub>s</sub> T <sub>s</sub> A                                                                                 | 5003.0                  | 5003.1             |
| 33-P       | T <sub>s</sub> T <sub>s</sub> C <sub>s</sub> a <sub>s</sub> t <sub>s</sub> t <sub>s</sub> t <sub>s</sub> t <sub>s</sub> a <sub>s</sub> g <sub>s</sub> g <sub>s</sub> a <sub>s</sub> G <sub>s</sub> C <sub>s</sub> T                                                                                 | 4994.0                  | 4994.1             |
| 33-Q       | T <sub>s</sub> G <sub>s</sub> T <sub>s</sub> t <sub>s</sub> C <sub>s</sub> a <sub>s</sub> t <sub>s</sub> t <sub>s</sub> t <sub>s</sub> a <sub>s</sub> g <sub>s</sub> G <sub>s</sub> A <sub>s</sub> G                                                                                                | 5006.0                  | 5006.0             |
| 33-R       | T <sub>s</sub> C <sub>s</sub> C <sub>s</sub> g <sub>s</sub> t <sub>s</sub> g <sub>s</sub> g <sub>s</sub> a <sub>s</sub> a <sub>s</sub> t <sub>s</sub> t <sub>s</sub> G <sub>s</sub> C <sub>s</sub> A                                                                                                | 5027.0                  | 5027.1             |
| Ina ctrl   | A <sub>s</sub> T <sub>s</sub> T <sub>s</sub> t <sub>s</sub> t <sub>s</sub> a <sub>s</sub> t <sub>s</sub> t <sub>s</sub> C <sub>s</sub> g <sub>s</sub> g <sub>s</sub> a <sub>s</sub> G <sub>s</sub> C <sub>s</sub> T                                                                                 | 4980.0                  | 4980.4             |
| Ina scr2   | A <sub>s</sub> A <sub>s</sub> C <sub>s</sub> a <sub>s</sub> <sup>m</sup> C <sub>s</sub> g <sub>s</sub> t <sub>s</sub> <sup>m</sup> C <sub>s</sub> t <sub>s</sub> a <sub>s</sub> t <sub>s</sub> a <sub>s</sub> C <sub>s</sub> G <sub>s</sub> C <sub>s</sub><br>( <sup>m</sup> C is 5-methylcytosine) | 4984.1                  | 4983.5             |

**Table S4.** Biostable and biocleavable LNA gapmer ASOs designed to target hADAM33 mRNA, with mass spectrometry data.

| Conjugated LNA gapmer    | Sequence (5'-3')<br>‘ <sub>s</sub> ’: phosphorothioate; LNA; Lowercase: DNA; HOP: Hexadecyloxypropyl                                                                                                                                 | Calculated mass (g/mol) | Found mass (g/mol) |
|--------------------------|--------------------------------------------------------------------------------------------------------------------------------------------------------------------------------------------------------------------------------------|-------------------------|--------------------|
| <b>33-N biostable</b>    | HOP <sub>s</sub> A <sub>s</sub> G <sub>s</sub> G <sub>s</sub> t <sub>s</sub> g <sub>s</sub> t <sub>s</sub> c <sub>s</sub> a <sub>s</sub> g <sub>s</sub> g <sub>s</sub> t <sub>s</sub> T <sub>s</sub> T <sub>s</sub> T                | 5400.2                  | 5399.7             |
| <b>33-O biostable</b>    | HOP <sub>s</sub> T <sub>s</sub> C <sub>s</sub> A <sub>s</sub> t <sub>s</sub> t <sub>s</sub> t <sub>s</sub> t <sub>s</sub> a <sub>s</sub> g <sub>s</sub> g <sub>s</sub> a <sub>s</sub> g <sub>s</sub> C <sub>s</sub> T <sub>s</sub> A | 5364.2                  | 5364.8             |
| <b>33-P biostable</b>    | HOP <sub>s</sub> T <sub>s</sub> T <sub>s</sub> C <sub>s</sub> a <sub>s</sub> t <sub>s</sub> t <sub>s</sub> t <sub>s</sub> t <sub>s</sub> a <sub>s</sub> g <sub>s</sub> g <sub>s</sub> a <sub>s</sub> G <sub>s</sub> C <sub>s</sub> T | 5355.2                  | 5355.8             |
| <b>33-N biocleavable</b> | HOP t t t t t t A <sub>s</sub> G <sub>s</sub> G <sub>s</sub> t <sub>s</sub> g <sub>s</sub> t <sub>s</sub> c <sub>s</sub> a <sub>s</sub> g <sub>s</sub> g <sub>s</sub> t <sub>s</sub> T <sub>s</sub> T <sub>s</sub> T                 | 7209.4                  | 7208.8             |
| <b>33-O biocleavable</b> | HOP t t t t t t T <sub>s</sub> C <sub>s</sub> A <sub>s</sub> t <sub>s</sub> t <sub>s</sub> t <sub>s</sub> t <sub>s</sub> a <sub>s</sub> g <sub>s</sub> g <sub>s</sub> a <sub>s</sub> g <sub>s</sub> C <sub>s</sub> T <sub>s</sub> A  | 7190.5                  | 7189.3             |
| <b>33-P biocleavable</b> | HOP t t t t t t T <sub>s</sub> T <sub>s</sub> C <sub>s</sub> a <sub>s</sub> t <sub>s</sub> t <sub>s</sub> t <sub>s</sub> t <sub>s</sub> a <sub>s</sub> g <sub>s</sub> g <sub>s</sub> a <sub>s</sub> G <sub>s</sub> C <sub>s</sub> T  | 7181.5                  | 7181.0             |

**Table S5.** LNA gapmer ASOs designed to target mAdam33 mRNA, with mass spectrometry data.

| LNA gapmer   | Sequence (5'-3')<br>‘ <sub>s</sub> ’: phosphorothioate; LNA; Lowercase: DNA                                                                                                                                         | Calculated mass (g/mol) | Found mass (g/mol) |
|--------------|---------------------------------------------------------------------------------------------------------------------------------------------------------------------------------------------------------------------|-------------------------|--------------------|
| <b>m33-G</b> | (same as human <b>33-G</b> sequence, Table S3)                                                                                                                                                                      | 5023.0                  | 5022.1             |
| <b>m33-N</b> | A <sub>s</sub> G <sub>s</sub> G <sub>s</sub> c <sub>s</sub> a <sub>s</sub> t <sub>s</sub> c <sub>s</sub> t <sub>s</sub> c <sub>s</sub> g <sub>s</sub> g <sub>s</sub> t <sub>s</sub> T <sub>s</sub> T <sub>s</sub> G | 4991.9                  | 4991.4             |
| <b>m33-P</b> | T <sub>s</sub> A <sub>s</sub> A <sub>s</sub> g <sub>s</sub> c <sub>s</sub> t <sub>s</sub> c <sub>s</sub> a <sub>s</sub> g <sub>s</sub> a <sub>s</sub> g <sub>s</sub> t <sub>s</sub> T <sub>s</sub> C <sub>s</sub> G | 4999.0                  | 4998.4             |
| <b>m33-Q</b> | G <sub>s</sub> G <sub>s</sub> T <sub>s</sub> a <sub>s</sub> a <sub>s</sub> g <sub>s</sub> c <sub>s</sub> t <sub>s</sub> c <sub>s</sub> a <sub>s</sub> g <sub>s</sub> a <sub>s</sub> G <sub>s</sub> T <sub>s</sub> T | 5025.0                  | 5024.4             |
| <b>m33-R</b> | T <sub>s</sub> C <sub>s</sub> T <sub>s</sub> a <sub>s</sub> t <sub>s</sub> g <sub>s</sub> a <sub>s</sub> c <sub>s</sub> a <sub>s</sub> a <sub>s</sub> c <sub>s</sub> a <sub>s</sub> G <sub>s</sub> C <sub>s</sub> T | 4957.3                  | 4956.5             |
